# Supplementary material for: Maternal Dietary Fiber Composition during Gestation Induces Changes in Offspring Antioxidative Capacity, Inflammatory Response, and Gut Microbiota in a Sow Model
Source: PubMed Central journal article supplement (PMC6981455; doi:10.3390/ijms21010031), 2019-12-19
Supplement: ijms-21-00031-s001.pdf [file ijms-21-00031-s001.pdf]

1 **Table S1.** Analysis of ANOSIM to access beta diversity of sow fecal microbiota on day 110 of pregnancy

| Group-Pair      | R-Value | <i>p</i> value |
|-----------------|---------|----------------|
| R1 <i>vs</i> R2 | -0.009  | 0.484          |
| R1 <i>vs</i> R3 | 0.326   | 0.006          |
| R1 <i>vs</i> R4 | 0.270   | 0.003          |
| R2 <i>vs</i> R3 | 0.213   | 0.010          |
| R2 <i>vs</i> R4 | 0.104   | 0.090          |
| R3 <i>vs</i> R4 | 0.024   | 0.331          |

2 R1, R2, R3 and R4 were diets in which the ratios of insoluble to soluble fiber were 3.89, 5.59, 9.12 and 12.81,  
3 respectively.  $p < 0.05$  was considered statistically significant.  $n=6$  for each treatment.

4 **Table S2.** Effects of the ratio of insoluble to soluble fiber in gestation diets of sows on the relative  
5 abundance of fecal microbiota in genus level

| Taxonomy, %                               | Treatments                  |                             |                         |                        | <i>p</i><br>valu<br>e |
|-------------------------------------------|-----------------------------|-----------------------------|-------------------------|------------------------|-----------------------|
|                                           | R1                          | R2                          | R3                      | R4                     |                       |
| Streptococcus                             | 7.88±0.98 <sup>b</sup>      | 7.51±0.84 <sup>b</sup>      | 12.10±1.09<br>a         | 10.34±0.56<br>a        | 0.049                 |
| Clostridium_sensu_stricto_1               | 8.50±0.93                   | 8.61±1.19                   | 8.53±0.79               | 9.03±1.54              | 0.880                 |
| Prevotella_9                              | 4.65±1.44                   | 2.19±0.56                   | 5.04±2.30               | 3.42±1.04              | 0.224                 |
| Prevotellaceae_NK3B31_group               | 3.28±0.34                   | 3.06±0.37                   | 2.90±0.65               | 5.39±1.81              | 0.092                 |
| Lactobacillus                             | 4.40±1.08                   | 3.06±0.59                   | 3.69±0.50               | 4.69±1.40              | 0.429                 |
| Treponema_2                               | 4.30±0.86 <sup>a</sup><br>b | 4.84±0.63 <sup>a</sup>      | 4.65±0.90 <sup>a</sup>  | 1.93±0.57 <sup>b</sup> | 0.015                 |
| Succinivibrio                             | 1.09±0.29 <sup>a</sup><br>b | 1.57±0.36 <sup>a</sup><br>b | 0.89±0.19 <sup>b</sup>  | 2.87±0.74 <sup>a</sup> | 0.011                 |
| Methanobrevibacter                        | 2.18±0.31                   | 1.39±0.33                   | 0.95±0.37               | 1.66±0.33              | 0.127                 |
| Prevotellaceae_UCG-001                    | 1.78±0.60                   | 1.72±0.38                   | 1.33±0.57               | 0.80±0.32              | 0.295                 |
| Lachnospiraceae_XPB1014_group             | 1.34±0.10                   | 1.61±0.23                   | 2.09±0.30               | 1.65±0.38              | 0.296                 |
| Ruminococcaceae_UCG-005                   | 1.98±0.13 <sup>b</sup>      | 2.63±0.08 <sup>a</sup>      | 2.65±0.19 <sup>a</sup>  | 2.73±0.24 <sup>a</sup> | 0.007                 |
| Megasphaera                               | 0.55±0.12                   | 0.42±0.07                   | 0.26±0.05               | 0.70±0.28              | 0.052                 |
| Turicibacter                              | 1.70±0.17                   | 2.00±0.31                   | 1.63±0.21               | 1.61±0.26              | 0.635                 |
| Rikenellaceae_RC9_gut_group               | 2.95±0.28                   | 2.96±0.37                   | 3.02±0.23               | 2.77±0.46              | 0.967                 |
| Ruminococcaceae_UCG-002                   | 1.59±0.14                   | 1.63±0.08                   | 1.52±0.19               | 1.27±0.17              | 0.337                 |
| Prevotella_1                              | 2.04±0.56 <sup>a</sup>      | 0.94±0.55 <sup>a</sup><br>b | 0.49±0.06 <sup>b</sup>  | 0.45±0.10 <sup>b</sup> | 0.003                 |
| Bifidobacterium                           | 0.76±0.25 <sup>a</sup><br>b | 1.36±0.58 <sup>a</sup>      | 0.41±0.09 <sup>b</sup>  | 0.31±0.06 <sup>b</sup> | 0.006                 |
| Terrisporobacter                          | 1.49±0.11                   | 1.79±0.32                   | 1.45±0.11               | 1.43±0.26              | 0.585                 |
| Ruminococcaceae_NK4A214_group             | 1.75±0.13                   | 1.79±0.10                   | 1.64±0.19               | 1.32±0.16              | 0.105                 |
| Alloprevotella                            | 1.13±0.16                   | 1.04±0.13                   | 1.13±0.20               | 1.73±0.46              | 0.144                 |
| Anaerovibrio                              | 0.54±0.13                   | 0.88±0.50                   | 0.55±0.09               | 0.84±0.25              | 0.434                 |
| Erysipelotrichaceae_UCG-002               | 0.38±0.19 <sup>a</sup>      | 0.13±0.03 <sup>a</sup><br>b | 0.08±0.02 <sup>b</sup>  | 0.07±0.02 <sup>b</sup> | 0.004                 |
| Oscillospira                              | 0.92±0.14                   | 1.45±0.35                   | 1.06±0.09               | 1.32±0.24              | 0.130                 |
| Phascolarctobacterium                     | 0.63±0.18                   | 0.46±0.05                   | 0.50±0.06               | 0.75±0.18              | 0.262                 |
| Ruminococcus_1                            | 1.09±0.19 <sup>a</sup>      | 1.38±0.32 <sup>a</sup>      | 0.87±0.10 <sup>ab</sup> | 0.52±0.08 <sup>b</sup> | 0.002                 |
| Prevotellaceae_UCG-003                    | 1.18±0.08                   | 1.14±0.12                   | 1.68±0.26               | 1.28±0.12              | 0.058                 |
| Ruminococcaceae_UCG-014                   | 0.85±0.08 <sup>a</sup>      | 0.91±0.05 <sup>a</sup>      | 0.71±0.15 <sup>a</sup>  | 0.41±0.08 <sup>b</sup> | 0.002                 |
| Bacteroides                               | 0.37±0.06 <sup>b</sup>      | 0.41±0.07 <sup>b</sup>      | 0.72±0.10 <sup>ab</sup> | 0.88±0.23 <sup>a</sup> | 0.007                 |
| [Eubacterium]_coprostanoligenes_grou<br>p | 1.02±0.09 <sup>a</sup>      | 0.91±0.03 <sup>a</sup><br>b | 0.93±0.15 <sup>ab</sup> | 0.68±0.06 <sup>b</sup> | 0.046                 |
| Parabacteroides                           | 0.94±0.14 <sup>a</sup><br>b | 1.19±0.14 <sup>a</sup><br>b | 0.80±0.07 <sup>b</sup>  | 1.35±0.12 <sup>a</sup> | 0.013                 |
| Romboutsia                                | 0.57±0.05                   | 0.73±0.14                   | 0.55±0.07               | 0.52±0.10              | 0.391                 |

|                               |                        |                             |                         |                        |       |
|-------------------------------|------------------------|-----------------------------|-------------------------|------------------------|-------|
| Christensenellaceae_R-7_group | 0.74±0.07              | 0.87±0.05                   | 0.81±0.06               | 0.74±0.08              | 0.364 |
| Prevotella_7                  | 0.21±0.05              | 0.20±0.05                   | 0.25±0.18               | 0.27±0.13              | 0.932 |
| dgA-11_gut_group              | 0.62±0.14              | 0.48±0.04                   | 0.49±0.05               | 0.35±0.07              | 0.095 |
| Campylobacter                 | 0.21±0.01 <sup>b</sup> | 0.36±0.07 <sup>a</sup><br>b | 0.40±0.08 <sup>ab</sup> | 0.50±0.14 <sup>a</sup> | 0.030 |

6 <sup>1</sup>R1, R2, R3 and R4 were diets in which the ratios of insoluble to soluble fiber were 3.89, 5.59, 9.12 and  
7 12.81, respectively.

8 Values are mean ± standard error (n=6). <sup>a-b</sup>Means with different superscripts within a row differ (*P* < 0.05).

9 **Table S3.** Analysis of ANOSIM to access beta diversity of neonatal piglet colonic microbiota

| Group-Pair      | R-Value | <i>p</i> value |
|-----------------|---------|----------------|
| R1 <i>vs</i> R2 | -0.033  | 0.275          |
| R1 <i>vs</i> R3 | 0.607   | 0.013          |
| R1 <i>vs</i> R4 | 0.554   | 0.005          |
| R2 <i>vs</i> R3 | 0.457   | 0.002          |
| R2 <i>vs</i> R4 | 0.354   | 0.024          |
| R3 <i>vs</i> R4 | -0.051  | 0.578          |

10 R1, R2, R3 and R4 were diets in which the ratios of insoluble to soluble fiber were 3.89, 5.59, 9.12 and 12.81,  
11 respectively. *P* < 0.05 was considered statistically significant. n=6 for each treatment.

**Table S4.** Composition of the experimental diets during pregnancy (as-fed basis)

| Items                       | Treatments |        |        |        |
|-----------------------------|------------|--------|--------|--------|
|                             | R1         | R2     | R3     | R4     |
| Ingredient, %               |            |        |        |        |
| Corn                        | 71.50      | 71.50  | 71.50  | 71.50  |
| Dehulled soybean meal       | 10.20      | 10.20  | 10.20  | 10.20  |
| Wheat bran                  | 13.00      | 13.00  | 13.00  | 13.00  |
| Cellulose                   | -          | 1.00   | 2.00   | 2.50   |
| Inulin                      | 2.50       | 1.50   | 0.50   | -      |
| L-lysine HCl                | 0.17       | 0.17   | 0.17   | 0.17   |
| DL-methionine               | 0.01       | 0.01   | 0.01   | 0.01   |
| L-threonine                 | 0.04       | 0.04   | 0.04   | 0.04   |
| Calcium carbonate           | 0.97       | 0.97   | 0.97   | 0.97   |
| Dicalcium phosphate         | 0.52       | 0.52   | 0.52   | 0.52   |
| Salt                        | 0.40       | 0.40   | 0.40   | 0.40   |
| Choline chloride            | 0.14       | 0.14   | 0.14   | 0.14   |
| Vitamin premix <sup>1</sup> | 0.05       | 0.05   | 0.05   | 0.05   |
| Mineral premix <sup>2</sup> | 0.50       | 0.50   | 0.50   | 0.50   |
| Total                       | 100.00     | 100.00 | 100.00 | 100.00 |
| Calculated analysis         |            |        |        |        |
| Digestible energy, Mcal/kg  | 3.05       | 3.05   | 3.05   | 3.05   |
| Crude protein, %            | 12.13      | 12.13  | 12.13  | 12.13  |
| Crude fat, %                | 3.22       | 3.22   | 3.22   | 3.22   |
| Crude fiber, %              | 4.83       | 4.83   | 4.83   | 4.83   |
| Soluble fiber (SF), %       | 3.87       | 2.87   | 1.87   | 1.37   |
| Insoluble fiber (ISF), %    | 15.04      | 16.04  | 17.04  | 17.54  |
| Ratio of ISF to SF          | 3.89       | 5.59   | 9.12   | 12.81  |
| Dietary fiber, %            | 18.91      | 18.91  | 18.91  | 18.91  |
| Ca, %                       | 0.55       | 0.55   | 0.55   | 0.55   |
| Available P, %              | 0.24       | 0.24   | 0.24   | 0.24   |
| Lysine, %                   | 0.55       | 0.55   | 0.55   | 0.55   |
| Methionine, %               | 0.18       | 0.18   | 0.18   | 0.18   |
| Threonine, %                | 0.41       | 0.41   | 0.41   | 0.41   |
| Tryptophan, %               | 0.12       | 0.12   | 0.12   | 0.12   |

13

<sup>1</sup>Provided per kg of diet: vitamin A 7,500 IU, vitamin D<sub>3</sub> 5,000 IU, vitamin E 37.5 IU, vitamin K<sub>3</sub> 5 mg,

14

vitamin B<sub>1</sub> 5 mg, vitamin B<sub>2</sub> 12.5 mg, vitamin B<sub>6</sub> 7.5 mg, vitamin B<sub>12</sub> 0.05 mg, biotin 0.2 mg, niacin 50 mg,

15

folic acid 2.5 mg, D-calcium pantothenate 25 mg.

16 <sup>2</sup>Provided per kg of diet: Cu 10 mg (CuSO<sub>4</sub>), Fe 100 mg (FeSO<sub>4</sub>), I 0.6 mg (KI), Zn 100 mg (ZnSO<sub>4</sub>), Mn 30  
17 mg (MnSO<sub>4</sub>), Se 0.25 mg (Na<sub>2</sub>SeO<sub>3</sub>).

18 **Table S5.** Primer sequences used for quantitative real-time PCR

| Genes          | Gene bank No.  | Primer sequences <sup>1</sup> (5'-3')                 | Size, bp |
|----------------|----------------|-------------------------------------------------------|----------|
| $\beta$ -actin | AY550069.1     | F: AACTGGAACGGTGAAGGTGA<br>R: CTTTGGAAAGGCAGGGACT     | 174      |
| Nrf2           | XM_021075133.1 | F: GCCCCTGGAAGCGTTAAAC<br>R: GGACTGTATCCCCAGAAGGTTGT  | 67       |
| HO-1           | NM_001004027.1 | F: AGCTGTTTCTGAGCCTCCAA<br>R: CAAGACGGAAACACGAGACA    | 130      |
| NF- $\kappa$ B | NM_001114281.1 | F: AGTACCCTGAGGCTATAACTCGC<br>R: TCCGCAATGGAGGAGAAGTC | 133      |

19 <sup>1</sup> F, forward; R, reverse.
